# Supplementary material
Source: HighWire-hosted journal article supplement (https://www.rcpjournals.org/highwire/filestream/8339/field_highwire_adjunct_files/2/S3_Mean_D-dimer_and_inverted_age_adjusted_D-dimer.pdf)
Supplement: S3_Mean_D-dimer_and_inverted_age_adjusted_D-dimer.pdf [file S3_Mean_D-dimer_and_inverted_age_adjusted_D-dimer.pdf]

Supplementary file 3. Mean D-dimer and inverted age adjusted D-dimer – sensitivity, specificity, PPV and NPV of our cohort using the Lapner *et al*<sup>13</sup> criteria.

| <b>D-dimer cut-off</b>        | <b>Sensitivity</b> |              | <b>Specificity</b> |              | <b>PPV</b> |              | <b>NPV</b> |              |
|-------------------------------|--------------------|--------------|--------------------|--------------|------------|--------------|------------|--------------|
| Mean D-dimer (304 ng/ml)      | 0.99               | (0.92, 1.00) | 0.21               | (0.16, 0.27) | 0.25       | (0.20, 0.30) | 0.98       | (0.90, 1.00) |
| Inverted Age-adjusted D-dimer | 0.94               | (0.86, 0.98) | 0.36               | (0.30, 0.42) | 0.28       | (0.22, 0.34) | 0.96       | (0.90, 0.99) |
